# Supplementary material
Source: PubMed Central journal article supplement (PMC3008751)
Supplement: supp_00273.2010_Additional_Parameters.pdf [file supp_00273.2010_Additional_Parameters.pdf]

## Parameter Values

Initial values for flows, in ml per second

|           |       |
|-----------|-------|
| $Q_{a1}$  | 1.103 |
| $Q_{a2A}$ | 0.544 |
| $Q_{a2B}$ | 0.544 |
| $Q_{a3A}$ | 0.546 |
| $Q_{a3B}$ | 0.546 |
| $Q_{l1}$  | 1.095 |
| $Q_{l2}$  | 1.092 |
| $Q_{la}$  | 1.028 |
| $Q_{lv}$  | 1.131 |
| $Q_{p1}$  | 1.101 |
| $Q_{p2}$  | 1.089 |
| $Q_{p3}$  | 1.090 |
| $Q_{rv}$  | 1.131 |
| $Q_{v1A}$ | 0.547 |
| $Q_{v1B}$ | 0.547 |
| $Q_{v2}$  | 1.093 |

Initial values for volumes, in ml

|           |       |
|-----------|-------|
| $V_{a1}$  | 0.946 |
| $V_{a2}$  | 1.764 |
| $V_{a3A}$ | 1.304 |
| $V_{a3B}$ | 0.559 |
| $V_{l1}$  | 0.464 |
| $V_{l2}$  | 0.383 |
| $V_{la}$  | 0.372 |
| $V_{lv}$  | 0.420 |
| $V_{p1}$  | 0.281 |
| $V_{p2}$  | 0.172 |
| $V_{p3}$  | 0.256 |
| $V_{ra}$  | 0.296 |
| $V_{rv}$  | 0.460 |
| $V_{v1A}$ | 1.769 |
| $V_{v1B}$ | 0.758 |
| $V_{v2}$  | 8.519 |

Initial values for pressures, in mmHg and Pa

|           |         |       |
|-----------|---------|-------|
| $P_{a1}$  | 143.932 | 19189 |
| $P_{a2}$  | 133.168 | 17754 |
| $P_{a3A}$ | 86.301  | 11506 |
| $P_{a3B}$ | 36.986  | 4931  |
| $P_{aP}$  | 143.932 | 19189 |
| $P_{as}$  | 143.932 | 19189 |
| $P_{l1}$  | 11.289  | 1505  |
| $P_{l2}$  | 10.365  | 1382  |
| $P_{la}$  | 5.897   | 786   |
| $P_{lv}$  | 5.511   | 735   |
| $P_{P1}$  | 18.904  | 2520  |
| $P_{P2}$  | 17.593  | 2345  |
| $P_{P3}$  | 18.082  | 2411  |
| $P_{ra}$  | 5.897   | 786   |
| $P_{rv}$  | 5.511   | 735   |
| $P_{v1A}$ | 13.587  | 1811  |
| $P_{v1B}$ | 5.823   | 776   |
| $P_{v2}$  | 12.645  | 1686  |

Elastance parameter values, in mmHg/ml and Pa/ml

|             |       |        |
|-------------|-------|--------|
| $E_{minlv}$ | 15.04 | 2005   |
| $E_{maxlv}$ | 764.4 | 102000 |
| $E_{minrv}$ | 7.461 | 995    |
| $E_{maxrv}$ | 160.5 | 21400  |
| $E_{ra}$    | 18.42 | 2456   |
| $E_{la}$    | 23.03 | 3070   |

Resistance parameter values, in mmHg s/ml and Pa s/ml

|           |        |       |
|-----------|--------|-------|
| $R_{0p}$  | 2.952  | 394   |
| $R_{0s}$  | 3.929  | 524   |
| $R_{a1}$  | 12.873 | 1716  |
| $R_{a2}$  | 36.933 | 4924  |
| $R_{a3A}$ | 69.094 | 9212  |
| $R_{a3B}$ | 69.094 | 9212  |
| $R_{l1}$  | 5.229  | 697   |
| $R_{l2}$  | 2.614  | 349   |
| $R_{la}$  | 0.014  | 1.854 |
| $R_{p1}$  | 3.546  | 473   |
| $R_{p2}$  | 10.997 | 1466  |
| $R_{p3}$  | 7.864  | 1048  |
| $R_{ra}$  | 0.009  | 1.237 |
| $R_{v1A}$ | 2.324  | 310   |
| $R_{v1B}$ | 2.324  | 310   |
| $R_{v2}$  | 5.540  | 739   |

Capacitance values, in ml/mmHg and ml/Pa

|           |       |           |
|-----------|-------|-----------|
| $C_{a1}$  | 0.003 | 1.998e-05 |
| $C_{a2}$  | 0.006 | 4.218e-05 |
| $C_{a3A}$ | 0.006 | 4.655e-05 |
| $C_{a3B}$ | 0.006 | 4.655e-05 |
| $C_{l1}$  | 0.023 | 1.714e-04 |
| $C_{l2}$  | 0.017 | 1.286e-04 |
| $C_{p1}$  | 0.008 | 5.714e-05 |
| $C_{p2}$  | 0.005 | 3.809e-05 |
| $C_{p3}$  | 0.006 | 4.572e-05 |
| $C_{v1A}$ | 0.045 | 3.405e-04 |
| $C_{v1B}$ | 0.045 | 3.405e-04 |
| $C_{v2}$  | 0.253 | 1.900e-03 |

Inductance values, in mmHg s<sup>2</sup>/ml and Pa s

|          |       |       |
|----------|-------|-------|
| $L_{a1}$ | 0.004 | 0.470 |
| $L_{l2}$ | 0.004 | 0.470 |
| $L_{la}$ | 0.004 | 0.470 |
| $L_{lv}$ | 0.029 | 3.914 |
| $L_{p1}$ | 0.004 | 0.470 |
| $L_{ra}$ | 0.004 | 0.470 |
| $L_{rv}$ | 0.015 | 1.938 |
| $L_{v2}$ | 0.004 | 0.470 |

## Volume parameter values, in ml

|               |       |
|---------------|-------|
| $V_{una1}$    | 0.668 |
| $V_{una2}$    | 1.205 |
| $V_{una3A}$   | 0.651 |
| $V_{una3B}$   | 0.651 |
| $V_{unv1A}$   | 0.977 |
| $V_{unv1B}$   | 0.977 |
| $V_{unv2}$    | 6.312 |
| $V_{unp1}$    | 0.163 |
| $V_{unp2}$    | 0.098 |
| $V_{unp3}$    | 0.173 |
| $V_{unl1}$    | 0.244 |
| $V_{unl2}$    | 0.244 |
| $V_{max,lvb}$ | 0.005 |
| $V_{max,lab}$ | 0.005 |
| $V_{max,rvb}$ | 0.005 |
| $V_{max,rab}$ | 0.005 |

## Miscellaneous parameters

|            |             |                                             |
|------------|-------------|---------------------------------------------|
| $M$        | 240         | g; total animal mass                        |
| $a\varphi$ | 0.9         | heart elastance parameter                   |
| $b\varphi$ | 0.25        | heart elastance parameter                   |
| $v_m$      | 0.062       | slope of viscosity versus temperature       |
| $k_{ambA}$ | 0.0068      | g/s; heat exchange parameter                |
| $k_{ambB}$ | 0.0068      | g/s; heat exchange parameter                |
| $k_{aA}$   | 0.4         | ml/s; heat exchange parameter               |
| $k_{aB}$   | 0.4         | ml/s; heat exchange parameter               |
| $k_{mrt}$  | 6.17        | metabolic rate unit conversion              |
| $r_e$      | [minus]0.94 | small vascular resistance scaling exponent  |
| $r_{e1}$   | [minus]0.89 | medium vascular resistance scaling exponent |
| $r_{esys}$ | [minus]0.84 | large vascular resistance scaling exponent  |
| $l_e$      | [minus]0.75 | inductance scaling exponent                 |
| $l_e$      | [minus]1.0  | elastance scaling exponent                  |
| $v_m$      | 0.07        | viscosity versus temperature slope          |
